# Supplementary material for: Functional Evaluation of Upper Urinary Tract with Diuretic Mercaptoacetyltriglycine Renal Scans in Patients with Benign Prostatic Obstruction before and after Surgical Intervention: A Pilot Study
Source: Biomed Res Int. 2020 Aug 10;2020:4605683. doi: 10.1155/2020/4605683 (PMC7436344; doi:10.1155/2020/4605683)
Supplement: Supplementary Materials — . The Exel data used to support the findings of this study have been deposited in the Supplementary file. [file 4605683.f1.xls]

## Sheet: Sheet1
Preoperative proteinuria semiquantitative value	Postoperative proteinuria semiquantitative value	Preoperative Cr	Postoperative Cr	PreGFR	PostGFR	MAG3 delay at least in 1 kidney	PreT1/2 in Lt	PostT1/2 in Lt	PreT1/2 Rt	PostT1/r Rt	MAG3 improvement at least 1 kidney	MAG3 improvement in both kidneys	MAG3 definitely improved at least in 1 kidney	MAG3 definitely improved in both kidneys	Prostate size	Preop PSA	Postop PSA	DM	HTN	Smoking	BMI	Sx aggravation	Education	PreQmax	PostQmax	PreVV	PostVV	PrePVR	PostPVR	Bladder wall thickness	Preop Storage Sx	Preop Obstructive Sx	Preop IPSS	Preop QOL	Postop Storage Sx	Postop Obstructive Sx	Postop IPSS	Postop QOL	Compliance	Involuntary contraction	BOOI	Schaffer	BCI	Age
1	0	1.2	0.8	62.41	99.29	1	11.7	9	23	13.3	1	0	0	0	65	3.8	0.4	0	1	0	20.8	0	0	9	28	344	300	66	32	4.7	9	12	21	5	1	3	4	1	40	0	85	4	120	58
2	0	1.3	1.3	56.31	56.31	1	9.3	8.3	11.3	8.3	1	0	0	0	35	3.3	1.7	0	1	1	25.2	2	1	5	10.8	153	550	50	22	4.1	4	11	15	4	1	2	3	1	40	0	75	4	93	60
1	0	0.8	0.8	93.73	93.73	1	10.6	6	7.3	6	1	0	0	0	58.5	2.1	1.7	0	0	0	23.62	1	1	23	2.5	45	200	400	15	3	6	15	21	5	2	0	2	1	33	0	48	2	55	77
1	0	0.8	0.7	98.61	115.04	1	20.3	8	11.7	8.3	1	1	0	0	36	3.4	3.9	0	0	0	22.57	1	1	9.4	12.5	230	261	18	17	3.6	.	.	.	.	.	.	.	.	27	0	40	2	82	60
2	0	1.1	1.1	64.41	64.41	1	24.5	10.1	9.8	4.8	1	1	1	1	67	1.9	0.2	0	0	0	21.97	0	1	9.2	17	199	260	136	14	5.8	8	11	19	4	2	4	6	1	27	1	96	5	145	80
1	0	1.1	1.1	76.42	76.42	1	8.8	8.8	10.9	6	1	0	0	0	76	5.4	0.8	0	0	0	26.78	2	1	4	20.5	90	162	108	26	4.5	8	16	24	5	4	1	5	1	26	0	65	3	88	80
1	0	1.1	1.1	72.85	72.85	1	14.3	6	11.9	4	1	1	0	0	41	3.2	0.5	0	0	0	22.49	2	1	5.3	18	153	254	73	90	5.1	8	11	19	4	3	3	6	1	20	0	65	3	83	75
1	0	0.9	0.8	84.69	97.02	1	73.3	11.7	44.3	11.7	1	1	1	1	155	10.8	1.4	0	0	2	24.22	0	0	3.7	18	62	138	190	97	6.8	15	20	35	6	6	2	8	3	11	1	155	6	173	65
1	0	0.9	0.9	86.37	86.37	1	17	4.3	13.7	5	1	1	0	0	106	10.3	0.9	0	0	0	25.35	0	0	17	25.6	131	202	76	39	5.6	15	18	33	6	1	1	2	0	10	0	150	6	210	58
1	0	0.9	0.8	91.8	105.53	1	33	12	11	8	1	1	1	0	99	9.6	0.9	0	0	0	25.35	1	0	4.6	25	115	102	6	36	6.5	15	18	33	5	2	2	4	1	10	0	125	6	143	58
2	2	1.3	1.1	55.82	67.26	1	24.1	15	21.9	14	1	1	0	0	60	7.8	4.6	1	1	0	22.3	0	1	7.9	20	280	310	40	10	4	3	10	13	4	1	0	1	0	90	0	62	3	90	75
1	1	1	0.9	74.09	83.67	0	4	4.3	4.9	5	0	0	0	0	89	5.6	0.9	1	1	0	26.23	3	1	6.3	12	167	156	35	6	3.2	14	18	32	5	7	4	11	2	70	0	90	5	125	69
1	1	4.9	4.1	12	15	1	36	32	48	40	0	0	0	0	65.3	17.2	4.8	1	1	1	21.1	.	.	10.3	13.5	195	134	91	29	.	5	8	13	4	0	2	2	1	60	0	41	2	76	77
0	0	1	1	74.3	74.3	1	7	7	20	7	1	0	1	0	33	1.7	1.3	0	1	0	24.82	2	1	5.9	20	77	200	20	17	4.5	7	16	23	6	2	4	6	2	55	0	98	5	105	69
0	0	1	0.9	70.85	79.82	0	7	6.3	9.3	5.3	0	0	0	0	130	13.6	0.2	0	1	0	23.59	1	1	12.9	12.7	261	146	157	63	3	7	8	15	4	1	0	1	0	50	0	50	3	110	80
1	0	1.3	1.2	55.9	61.15	0	7	4	9	5.6	1	1	0	0	39	0.4	0.8	1	0	0	23.46	3	1	3.9	24	70	440	90	80	3.9	6	12	18	5	2	2	4	1	100	0	76	4	90	63
0	0	1	0.8	88.67	101.58	0	6.8	4.3	6.8	7.3	1	0	0	0	85	8.9	0.5	0	0	2	24.06	2	1	9	21	359	200	171	17	4	12	20	32	5	5	0	5	1	100	0	120	6	155	70
1	1	1	0.9	75.47	85.79	0	8.6	4.3	6.7	4.3	1	1	0	0	66	8.1	0.9	0	0	2	23.66	3	1	9.9	22.4	316	240	99	19	3.5	9	14	23	5	3	3	6	2	99	0	69	4	159	60
0	0	1.1	0.7	67.18	112	0	9.3	6	9.3	6	1	1	0	0	67.7	9.8	3.1	0	0	0	25.1	1	0	5.3	16	194	199	46	33	3.7	6	9	15	4	2	3	5	1	86	0	50	2	75	66
